# Supplementary material for: Identification of potential biomarkers of myopia based on machine learning algorithms
Source: BMC Ophthalmol. 2023 Sep 22;23:388. doi: 10.1186/s12886-023-03119-5 (PMC10517464; doi:10.1186/s12886-023-03119-5)
Supplement: Supplementary file 1 — Additional file 1. [file 12886_2023_3119_MOESM1_ESM.zip]

Archive with 8 entries (8 files):
- count to TPMorFPKM.R
- Diagnostic12.lasso.R
- Diagnostic13.SVM-RFE.R
- Extract the target gene.R
- WGCNA12.GEOdiff.R
- WGCNA15.symbol2id.R
- WGCNA16.GO.R
- WGCNA17.KEGG.R
