# Supplementary material for: Identification of potential biomarkers of myopia based on machine learning algorithms
Source: BMC Ophthalmol. 2023 Sep 22;23:388. doi: 10.1186/s12886-023-03119-5 (PMC10517464; doi:10.1186/s12886-023-03119-5)
Supplement: Supplementary file 1 — Additional file 1. [file 12886_2023_3119_MOESM1_ESM.zip › count to TPMorFPKM.R]

rm(list = ls())#É¾³ýÄ¿Ç°¹¤×÷Ä¿Â¼µÄ±äÁ¿
#install.packages("xlsx")
#install.packages("readxl")
setwd("D:\\XY\\67")
library(xlsx)
library(readxl)
library(limma)
ann<- read_excel("GSE151631-COUNT.xlsx")#¶ÁÈ¡»ùÒòÎÄ¼þ
input<- read_excel("All_hg19gene_len.xlsx")#×Ô¼ºÔÚExcelÖÐ°ÑÍøÅÌÀïµÄtxtÎÄ¼þ»ùÒòºÍ³¤¶È¹²Á½ÁÐÌáÈ¡³öÀ´
library(dplyr)
merge<-left_join(ann,input,by="Gene")#¸ù¾Ý»ùÒòÄÇÁÐ½øÐÐºÏ²¢
merge <- na.omit(merge)#É¾³ý´íÎóÖµÐÐ
write.csv(merge,file = "merge.csv",sep = "\t")#¶Á³öÎÄ¼þ£¬Ö±½ÓÍùÏÂÔËÐÐÒ²Ðí

mycounts<-read.csv("merge.csv")
head(mycounts)
rownames(mycounts)<-mycounts[,1]
mycounts<-mycounts[,-1]
mycounts=avereps(mycounts)
rownames(mycounts)<-mycounts[,1]
mycounts<-mycounts[,-1]
head(mycounts)#×îºóÒ»ÁÐLengthÊÇ»ùÒò³¤¶È
mycounts <- data.frame(mycounts)
mycounts[,c(1:27)] <- as.numeric(unlist(mycounts[,c(1:27)]))#ÐÞ¸ÄËùÓÐÁÐ

#TPM¼ÆËã
kb <- mycounts$Length / 1000
kb
countdata <- mycounts[,1:26] #ÐÞ¸ÄÊôÓÚcountÊýÔÚµÚ¼¸ÁÐµ½µÚ¼¸ÁÐ
rpk <- countdata / kb
rpk
tpm <- t(t(rpk)/colSums(rpk) * 1000000)
head(tpm)
write.table(tpm,file="GSE151631tpm.xls",sep="\t",quote=F)

#¼ÆËãfpkm
fpkm <- t(t(rpk)/colSums(countdata) * 10^6) 
head(fpkm)
write.table(fpkm,file="fpkm.xls",sep="\t",quote=F)
