# Supplementary material for: Identification of potential biomarkers of myopia based on machine learning algorithms
Source: BMC Ophthalmol. 2023 Sep 22;23:388. doi: 10.1186/s12886-023-03119-5 (PMC10517464; doi:10.1186/s12886-023-03119-5)
Supplement: Supplementary file 1 — Additional file 1. [file 12886_2023_3119_MOESM1_ESM.zip › Diagnostic12.lasso.R]

#install.packages("glmnet")


set.seed(123)
library(glmnet)                   #ÒýÓÃ°ü
inputFile="specialSEVdiff_Exp.txt"       #ÊäÈëÎÄ¼þ
setwd("D:\\XY\\59\\5.lasso\\SEV")       #ÉèÖÃ¹¤×÷Ä¿Â¼

#¶ÁÈ¡ÊäÈëÎÄ¼þ
rt=read.table(inputFile, header=T, sep="\t", check.names=F, row.names=1)
rt=t(rt)

#¹¹½¨Ä£ÐÍ
x=as.matrix(rt)
y=gsub("(.*)\\_(.*)", "\\2", row.names(rt))
fit=glmnet(x, y, family = "binomial", alpha=1)
cvfit=cv.glmnet(x, y, family="binomial", alpha=1,type.measure='deviance',nfolds = 10)
pdf(file="cvfit.pdf",width=6,height=5.5)
plot(cvfit)
dev.off()

#Êä³öÉ¸Ñ¡µÄÌØÕ÷»ùÒò
coef=coef(fit, s = cvfit$lambda.min)
index=which(coef != 0)
lassoGene=row.names(coef)[index]
lassoGene=lassoGene[-1]
write.table(lassoGene, file="LASSO.gene.txt", sep="\t", quote=F, row.names=F, col.names=F)
