# Supplementary material for: Identification of potential biomarkers of myopia based on machine learning algorithms
Source: BMC Ophthalmol. 2023 Sep 22;23:388. doi: 10.1186/s12886-023-03119-5 (PMC10517464; doi:10.1186/s12886-023-03119-5)
Supplement: Supplementary file 1 — Additional file 1. [file 12886_2023_3119_MOESM1_ESM.zip › Diagnostic13.SVM-RFE.R]

#install.packages("e1071")
#install.packages("kernlab")
#install.packages("caret")


#ÒýÓÃ°ü
library(e1071)
library(kernlab)
library(caret)

set.seed(123)
inputFile="specialSEVdiff_Exp.txt"        #ÊäÈëÎÄ¼þ
setwd("D:\\XY\\59\\6.SVM\\SEV")      #ÉèÖÃ¹¤×÷Ä¿Â¼

#¶ÁÈ¡ÊäÈëÎÄ¼þ
data=read.table(inputFile, header=T, sep="\t", check.names=F, row.names=1)
data=t(data)
group=gsub("(.*)\\_(.*)", "\\2", row.names(data))

#SVM-RFE·ÖÎö
Profile=rfe(x=data,
            y=as.numeric(as.factor(group)),
            sizes = c(2,4,6,8, seq(10,40,by=3)),
            rfeControl = rfeControl(functions = caretFuncs, method = "cv"),
            methods="svmRadial")

#»æÖÆÍ¼ÐÎ
pdf(file="SVM-RFE.pdf", width=6, height=5.5)
par(las=1)
x = Profile$results$Variables
y = Profile$results$RMSE
plot(x, y, xlab="Variables", ylab="RMSE (Cross-Validation)", col="darkgreen")
lines(x, y, col="darkgreen")
#±ê×¢½»²æÑéÖ¤Îó²î×îÐ¡µÄµã
wmin=which.min(y)
wmin.x=x[wmin]
wmin.y=y[wmin]
points(wmin.x, wmin.y, col="blue", pch=16)
text(wmin.x, wmin.y, paste0('N=',wmin.x), pos=2, col=2)
dev.off()

#Êä³öÑ¡ÔñµÄ»ùÒò
featureGenes=Profile$optVariables
write.table(file="SVM-RFE.gene.txt", featureGenes, sep="\t", quote=F, row.names=F, col.names=F)
