# Supplementary material for: Identification of potential biomarkers of myopia based on machine learning algorithms
Source: BMC Ophthalmol. 2023 Sep 22;23:388. doi: 10.1186/s12886-023-03119-5 (PMC10517464; doi:10.1186/s12886-023-03119-5)
Supplement: Supplementary file 1 — Additional file 1. [file 12886_2023_3119_MOESM1_ESM.zip › Extract the target gene.R]

#if (!requireNamespace("BiocManager", quietly = TRUE))
#    install.packages("BiocManager")
#BiocManager::install("limma")


library(limma)            #ÒýÓÃ°ü
expFile="GSE151631tpm.txt"      #±í´ïÊäÈëÎÄ¼þ
geneFile="allvenn.txt"       #Ä¿µÄÎÄ¼þ
setwd("D:\\XY\\67\\4.lasso\\15")    #ÉèÖÃ¹¤×÷Ä¿Â¼

#¶ÁÈ¡ÊäÈëÎÄ¼þ£¬²¢¶ÔÊý¾Ý½øÐÐ´¦Àí
rt=read.table(expFile, header=T, sep="\t", check.names=F)
rt=as.matrix(rt)
rownames(rt)=rt[,1]
exp=rt[,2:ncol(rt)]
dimnames=list(rownames(exp),colnames(exp))
data=matrix(as.numeric(as.matrix(exp)),nrow=nrow(exp),dimnames=dimnames)
data=avereps(data)
data=data[rowMeans(data)>0,]

#»ñÈ¡Ä¿µÄ»ùÒòµÄ±í´ïÁ¿
gene=read.table(geneFile, header=T, check.names=F, sep="\t")
sameGene=intersect(as.vector(gene[,1]), rownames(data))
geneExp=data[sameGene,]

#Êä³ö½á¹û
out=rbind(ID=colnames(geneExp),geneExp)
write.table(out,file="GSE151631diff_Exp.txt",sep="\t",quote=F,col.names=F)
