# Supplementary material for: Identification of potential biomarkers of myopia based on machine learning algorithms
Source: BMC Ophthalmol. 2023 Sep 22;23:388. doi: 10.1186/s12886-023-03119-5 (PMC10517464; doi:10.1186/s12886-023-03119-5)
Supplement: Supplementary file 1 — Additional file 1. [file 12886_2023_3119_MOESM1_ESM.zip › WGCNA15.symbol2id.R]

#if (!requireNamespace("BiocManager", quietly = TRUE))
#    install.packages("BiocManager")
#BiocManager::install("org.Hs.eg.db")


library("org.Hs.eg.db")         #ÒýÓÃ°ü
inputFile="allvenn.txt"       #ÊäÈëÎÄ¼þ
setwd("D:\\XY\\67\\3.gokegg")      #ÉèÖÃ¹¤×÷Ä¿Â¼
rt=read.table(inputFile,sep="\t",check.names=F,header=F)    #¶ÁÈ¡ÊäÈëÎÄ¼þ
genes=as.vector(rt[,1])         #»ñÈ¡»ùÒòÁÐ±í
entrezIDs <- mget(genes, org.Hs.egSYMBOL2EG, ifnotfound=NA)    #ÕÒ³ö»ùÒò¶ÔÓ¦µÄid
entrezIDs <- as.character(entrezIDs)

#Êä³ö»ùÒòidµÄ½á¹ûÎÄ¼þ
out=cbind(rt,entrezID=entrezIDs)
colnames(out)[1]="Gene"
write.table(out,file="id.txt",sep="\t",quote=F,row.names=F)
