# Supplementary material for: Identification of potential biomarkers of myopia based on machine learning algorithms
Source: BMC Ophthalmol. 2023 Sep 22;23:388. doi: 10.1186/s12886-023-03119-5 (PMC10517464; doi:10.1186/s12886-023-03119-5)
Supplement: Supplementary file 1 — Additional file 1. [file 12886_2023_3119_MOESM1_ESM.zip › WGCNA17.KEGG.R]

#install.packages("colorspace")
#install.packages("stringi")
#install.packages("ggplot2")

#if (!requireNamespace("BiocManager", quietly = TRUE))
#    install.packages("BiocManager")
#BiocManager::install("DOSE")
#BiocManager::install("clusterProfiler")
#BiocManager::install("enrichplot")
#install.packages('R.utils')
#R.utils::setOption("clusterProfiler.download.method",'auto')

#ÒýÓÃ°ü
library("clusterProfiler")
library("org.Hs.eg.db")
library("enrichplot")
library("ggplot2")

pvalueFilter=0.05        #pÖµ¹ýÂËÌõ¼þ
qvalueFilter=1           #½ÃÕýºóµÄpÖµ¹ýÂËÌõ¼þ

setwd("D:\\XY\\67\\3.gokegg")         #ÉèÖÃ¹¤×÷Ä¿Â¼
rt=read.table("id.txt",sep="\t",header=T,check.names=F)    #¶ÁÈ¡id.txtÎÄ¼þ
rt=rt[is.na(rt[,"entrezID"])==F,]                          #È¥³ý»ùÒòidÎªNAµÄ»ùÒò
colnames(rt)[1]="Gene"
gene=rt$entrezID

#¶¨ÒåÑÕÉ«ÀàÐÍ
colorSel="qvalue"
if(qvalueFilter>0.05){
	colorSel="pvalue"
}

#kegg¸»¼¯·ÖÎö
kk <- enrichKEGG(gene = gene, organism = "hsa", pvalueCutoff =1, qvalueCutoff =1)
KEGG=as.data.frame(kk)
KEGG$geneID=as.character(sapply(KEGG$geneID,function(x)paste(rt$Gene[match(strsplit(x,"/")[[1]],as.character(rt$entrezID))],collapse="/")))
KEGG=KEGG[(KEGG$pvalue<pvalueFilter & KEGG$qvalue<qvalueFilter),]
#±£´æ¸»¼¯½á¹û
write.table(KEGG,file="KEGG.txt",sep="\t",quote=F,row.names = F)

#¶¨ÒåÏÔÊ¾TermÊýÄ¿#Öù×´Í¼
pdf(file="KEGGbarplot.pdf",width = 4.5,height = 7)
barplot(kk, drop = TRUE, showCategory = showNum, color = colorSel)
dev.off()

#ÆøÅÝÍ¼
pdf(file="KEGGbubble.pdf",width = 4.5,height = 7)
dotplot(kk, showCategory = showNum, orderBy = "GeneRatio",color = colorSel)
dev.off()
showNum=30
if(nrow(KEGG)<showNum){
	showNum=nrow(KEGG)
}
